# Supplementary material for: Preparation of two-dimensional assembled Ni–Mn–C ternary composites for high-performance all-solid-state flexible supercapacitors
Source: Royal Society of Chemistry journal article supplement (doi:10.1039/c8ta06412a), 2018-01-01
Supplement: c8ta06412a1.pdf [file c8ta06412a1.pdf]

## Electronic Supporting Information

### Preparation of Two-Dimensional Assembled Ni-Mn-C Ternary Composite for High-Performance All-Solid-State Flexible Supercapacitor

Xilian Xu,<sup>a</sup> Wenhui Shi,<sup>\*b</sup> Wenxian Liu,<sup>a</sup> Shaofeng Ye,<sup>a</sup> Ruilian Yin,<sup>a</sup> Lin Zhang,<sup>a</sup> Lixin Xu,<sup>a</sup> Minghua Chen,<sup>\*c</sup> Mingqiang Zhong<sup>\*a</sup> and Xiehong Cao<sup>\*ad</sup>

<sup>a</sup>College of Materials Science and Engineering, Zhejiang University of Technology, 18 Chaowang Road, Hangzhou 310014, China.

<sup>b</sup>Center for Membrane Separation and Water Science & Technology, Ocean College, Zhejiang University of Technology, 18 Chaowang Road, Hangzhou 310014, China.

<sup>c</sup>Key Laboratory of Engineering Dielectric and Applications (Ministry of Education), Harbin University of Science and Technology, 52, Xuefu Road, Harbin 150080, P. R. China.

<sup>d</sup>State Key Laboratory Breeding Base of Green Chemistry Synthesis Technology, Zhejiang University of Technology, 18 Chaowang Road, Hangzhou 310032, China.

## Experimental Section

### Synthesis of Ni-MOF crystals

In a typical procedure, 1.3 g  $\text{NiCl}_2 \cdot 6\text{H}_2\text{O}$  and 3 g  $\text{K}_2\text{C}_2\text{O}_4$  were dissolved in 20 mL deionized water (refer to as dispersion A). 1.5 mL ethylenediamine ( $\text{C}_2\text{H}_8\text{N}_2$ ) was added to 1.3 g  $\text{NiCl}_2 \cdot 6\text{H}_2\text{O}$  to form a dispersion B. Then, dispersion B was added dropwisely into dispersion A under stirring. After reaction at ambient condition for 48 h, the formed Ni-MOF crystals were collected by centrifugation followed by washing using methanol several times, and drying in a vacuum oven at 40 °C.

### Preparation of $\text{Ni}(\text{OH})_2\text{-MnO}_2/\text{C}$ , $\text{MnO}_2/\text{C}$ , $\text{Ni}(\text{OH})_2/\text{C}$ and Ni-MOF-derived porous carbon (NPC) composites

First, the prepared Ni-MOF crystals were annealed under  $\text{N}_2$  protection at 300 °C for 1 h, and then 700 °C for another 2 h to obtain the Ni@C composite. After that, 20 mg Ni@C composite and 6 mg potassium permanganate ( $\text{KMnO}_4$ ) were dispersed in 36 mL deionized water. The mixed solution was transferred into a 50 mL Teflon-lined stainless-steel autoclave, and then heated at 150 °C for 24 h. The  $\text{Ni}(\text{OH})_2\text{-MnO}_2/\text{C}$  composites were collected and washed with distilled water several times, and then dried in a vacuum oven at 60 °C. Ni-MOF-derived porous carbon (NPC) was obtained by etching Ni@C composite using an aqueous mixture of 3 M  $\text{FeCl}_3$  and 3 M  $\text{HCl}$  at 80 °C for 8 h, followed by washing with deionized water until  $\text{PH}=7$ , and then drying in a vacuum oven at 60 °C.

The preparation of  $\text{MnO}_2/\text{C}$  composites is similar to that of the  $\text{Ni}(\text{OH})_2\text{-MnO}_2/\text{C}$  composites. Briefly, Ni-MOF-derived porous carbon and potassium permanganate ( $\text{KMnO}_4$ ) (mass ratio of 3:1) was dispersed in 36 ml deionized water. The obtained solution was transferred into a 50 mL Teflon-lined stainless-steel autoclave, and then heated at 150 °C for 1 h. The  $\text{MnO}_2/\text{C}$  composites were collected and washed with distilled water several times, and then dried in a vacuum oven at 60 °C.

The  $\text{Ni}(\text{OH})_2/\text{C}$  composite was prepared by mixing 30 mg NPC, 32 mg  $\text{NiCl}_2 \cdot 6\text{H}_2\text{O}$  and 50 mg Urea in 20 mL distilled water. Then the mixed solution was transferred into a 50 mL Teflon-lined stainless-steel autoclave, and heated at 180 °C for 2 h. The  $\text{Ni}(\text{OH})_2/\text{C}$  composites were

collected and washed with distilled water several times, and then dried in a vacuum oven at 60 °C.

### **Material characterizations**

The field emission scanning electron microscope (FESEM, Hitachi SL8010) and transmission electron microscopy (TEM, JEM-100CX II) were used to characterize morphology, microstructure and element compositions of the samples. The structures of the samples were identified by a X-ray powder diffractometer (XRD, PANalytical X'Pert PRO) with Cu K $\alpha$  radiation ( $\lambda = 1.54056 \text{ \AA}$ ) operating at 40 kV and 250 mA, and a Raman spectroscopy (LabRAM HR800 Horiba JobinYvon) with a 531.95 nm laser. The surface chemical states of samples were investigated using a X-ray photoelectron spectroscopy (XPS, Shimadzu Co., Ltd. Hongkong) with a Kratos Axis Ultra-DLD system.

### **Electrochemical measurements**

The Ni(OH)<sub>2</sub>-MnO<sub>2</sub>/C composites electrode was fabricated by coating a slurry, which is composed of Ni(OH)<sub>2</sub>-MnO<sub>2</sub>/C composites, acetylene black and polyvinylidene difluoride (weight ratio is 8:1:1) dispersed in N-methyl-2-pyrrolidone (NMP), on a carbon paper. Then, the prepared electrodes were dried in a vacuum oven at 80 °C for overnight. Measurements of CV, galvanostatic charge/discharge, electrochemical impedance spectroscopy were carried out on a CHI 760E electrochemistry workstation. The electrochemical measurements of individual working electrodes were performed in 6 M KOH aqueous solution using three-electrode configuration. A platinum foil was used as counter electrode, and an Ag/AgCl was served as reference electrode. The all-solid-state symmetric supercapacitor was constructed by using Ni(OH)<sub>2</sub>-MnO<sub>2</sub>/C composites as cathode and anode, and KOH/poly(vinyl alcohol) (PVA) gel as solid electrolyte. The KOH/PVA gel electrolyte was prepared by mixing 0.5 g PVA and 0.5 g KOH in 5 mL distilled water at 80-90 °C to form a homogeneous gel.

The capacitive contribution from surface- and diffusion-controlled processes was analyzed according to Dunn's method.<sup>47</sup> The current response ( $i$ ) in a fix potential ( $V$ ) were calculated according to the following equation:

$$i(V) = k_1v + k_2v^{1/2}$$

Where  $v$  is the sweep rate,  $k_1v$  and  $k_2v^{1/2}$  presents capacitive effects and diffusion-controlled insertion effects, respectively.

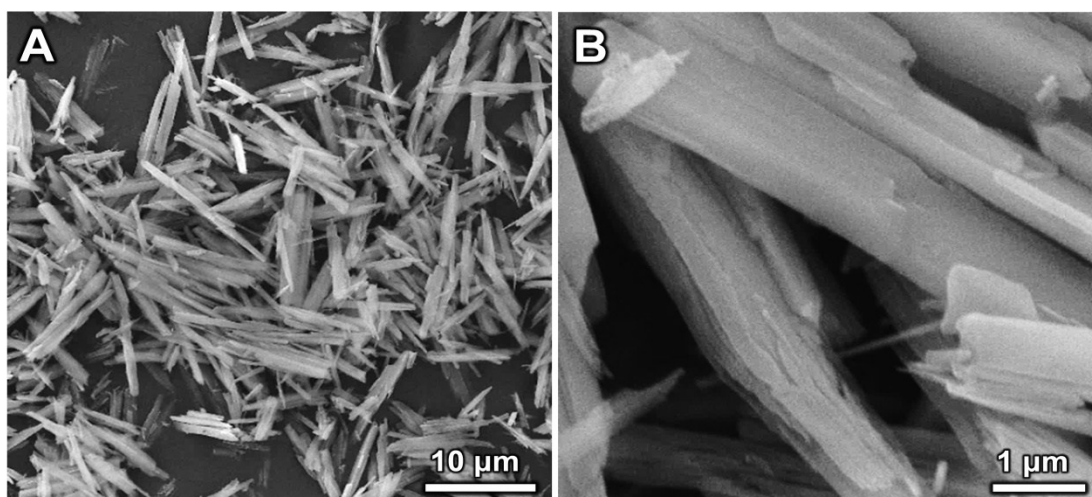

**Fig. S1.** SEM images of Ni-MOF crystals.

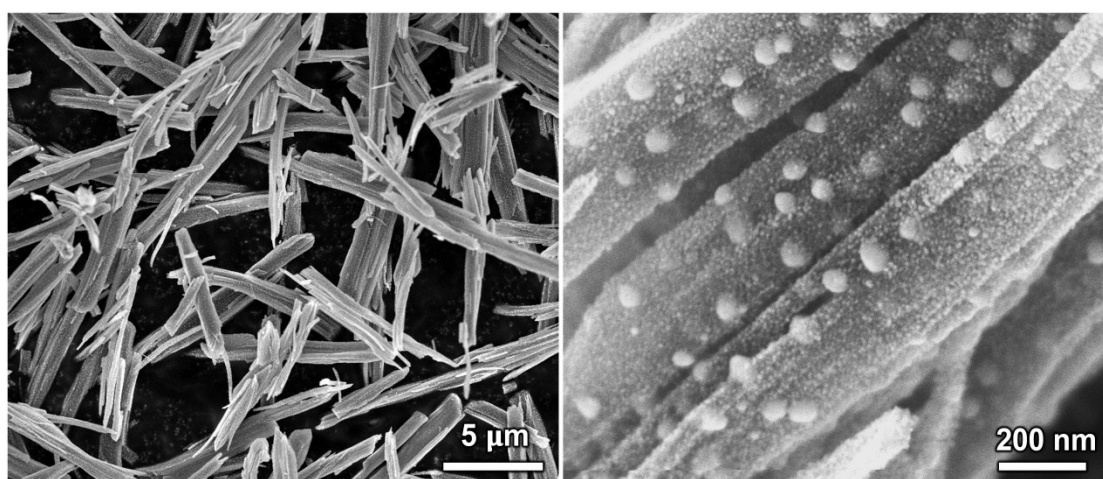

**Fig. S2.** SEM images of the Ni@C composite derived from Ni-MOF.

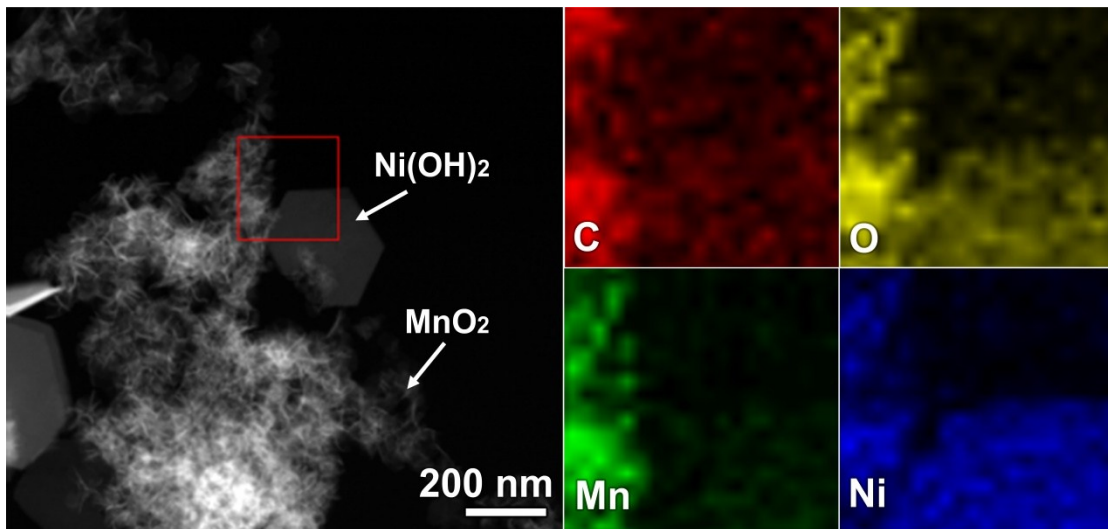

**Fig. S3.** TEM image of the Ni(OH)<sub>2</sub>-MnO<sub>2</sub>/C composite after a strong sonication to separate the components, and corresponding EDX element mapping images of the region indicated by the red box.

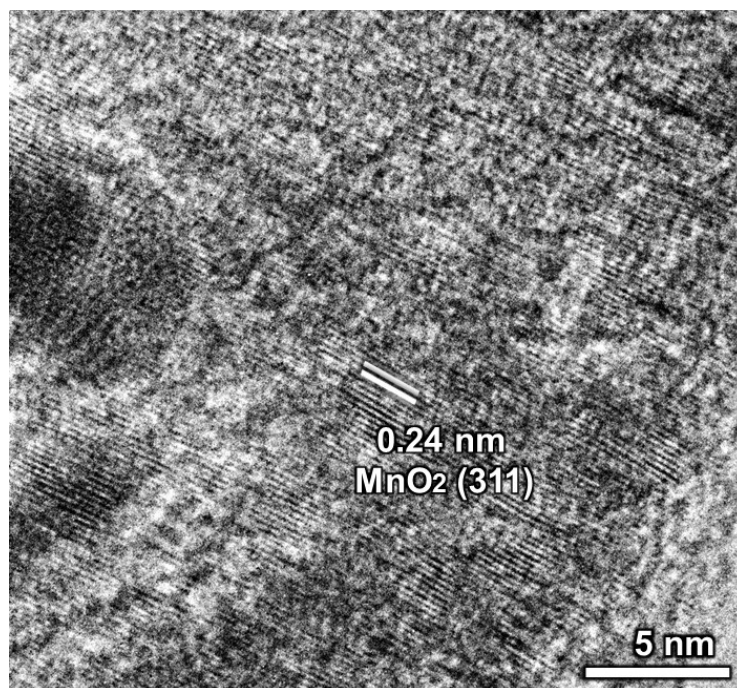

**Fig. S4.** HRTEM image of a MnO<sub>2</sub> nanosheet within obtained Ni(OH)<sub>2</sub>-MnO<sub>2</sub>/C composite.

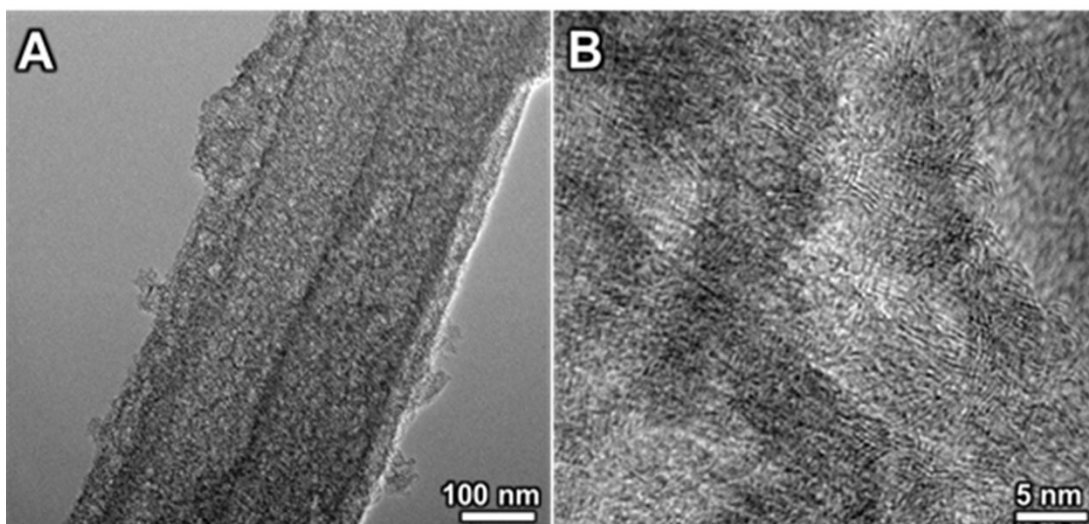

**Fig. S5.** TEM images of a porous carbon structure, which was obtained by the treatment of  $\text{Ni(OH)}_2\text{-MnO}_2/\text{C}$  composite in 1 M HCl for 8 h to completely remove  $\text{Ni(OH)}_2$ ,  $\text{MnO}_2$  and Ni.

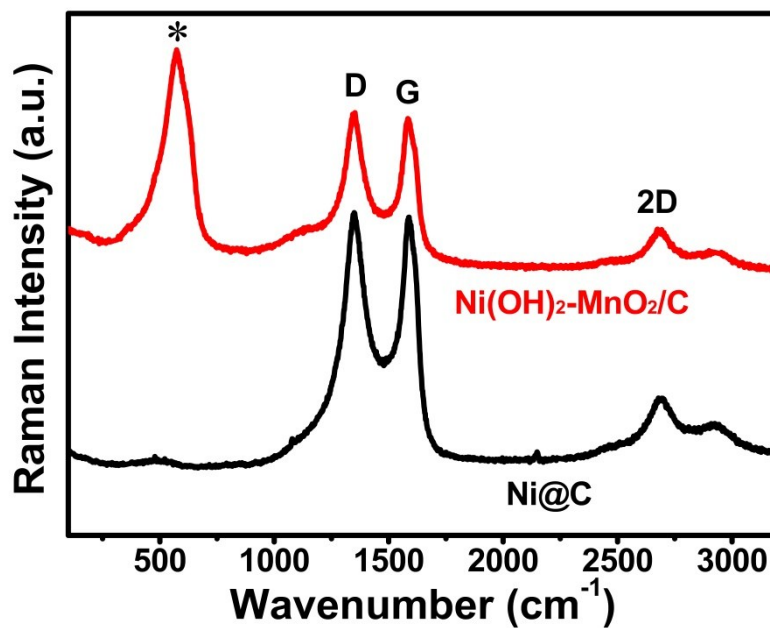

**Fig. S6.** Raman spectra of the  $\text{Ni(OH)}_2\text{-MnO}_2/\text{C}$  and  $\text{Ni@C}$  composites. \* indicates the peak which can be assigned to M-O (M = Ni, Mn) stretching vibrations from  $\text{Ni(OH)}_2$  and/or  $\text{MnO}_2$ .

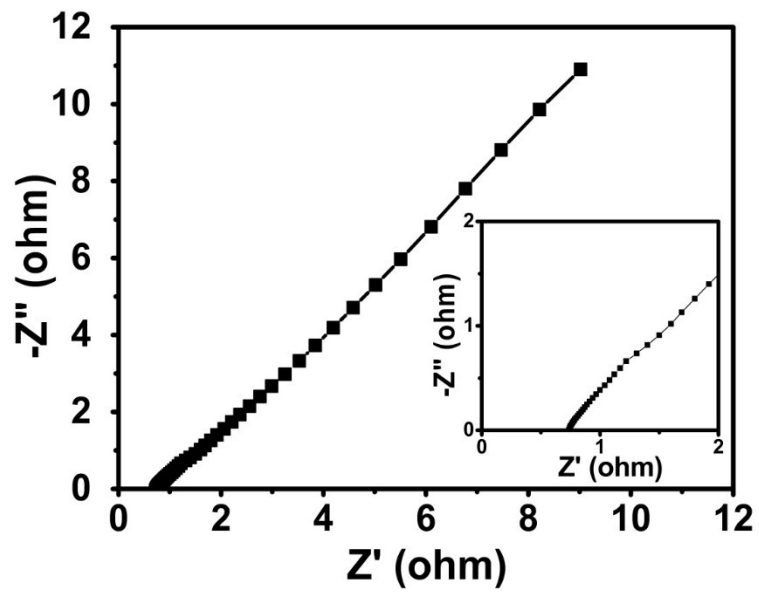

Fig. S7. Nyquist plot of the obtained  $\text{Ni(OH)}_2\text{-MnO}_2/\text{C}$  composite.



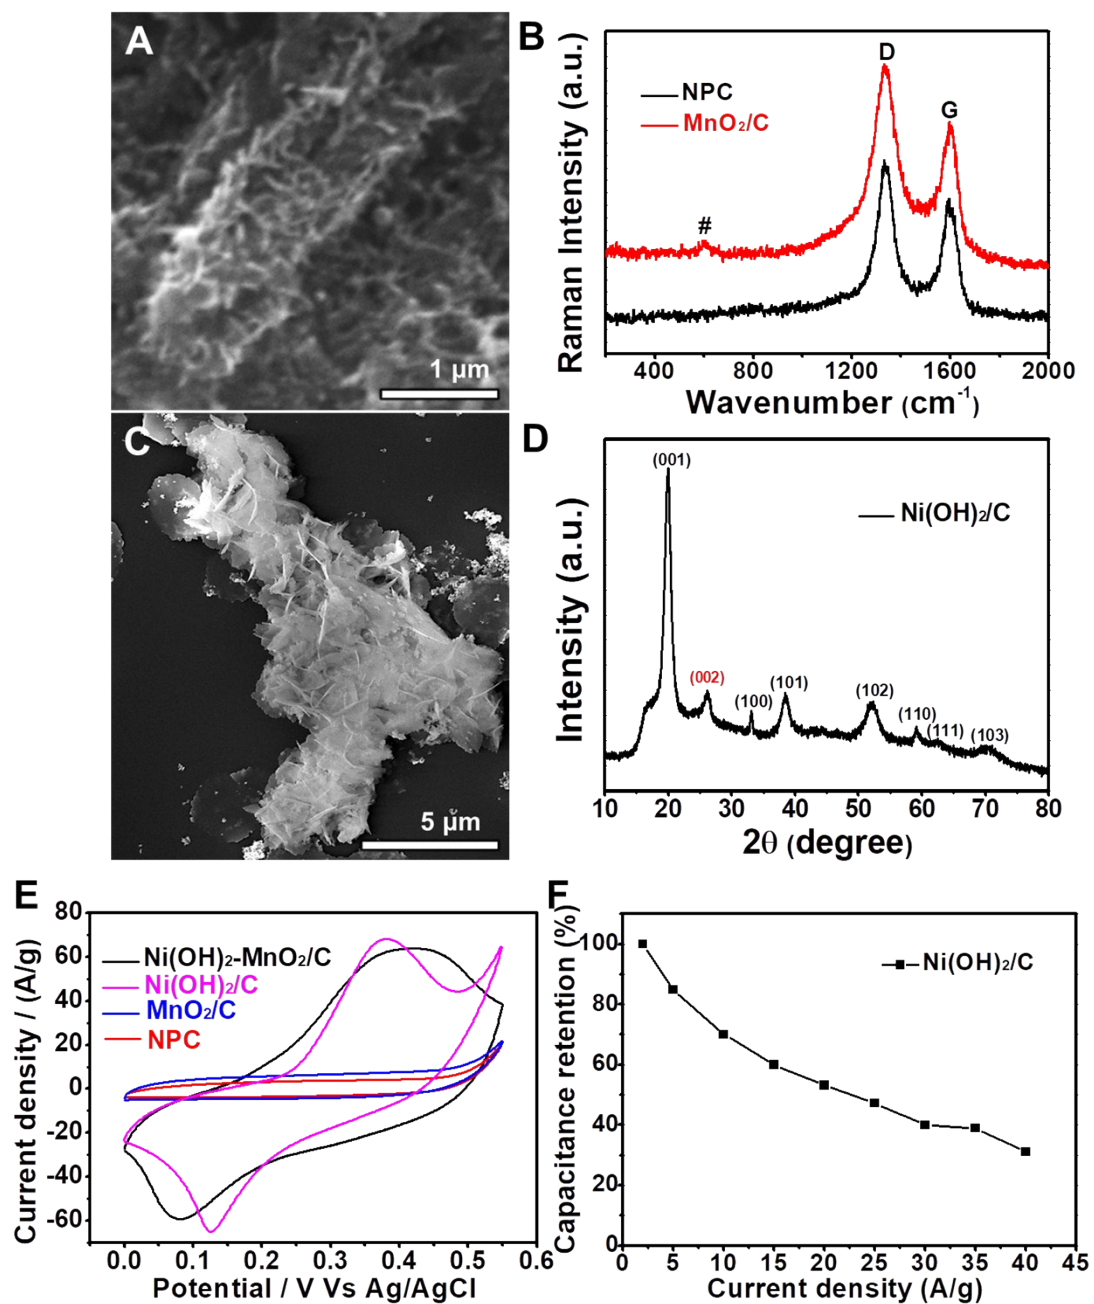

**Fig. S8.** (A) SEM images of the  $\text{MnO}_2/\text{C}$  composite. (B) Raman spectra of the  $\text{MnO}_2/\text{C}$  composite and Ni-MOF-derived porous carbon (NPC). # indicates the peak corresponding to Mn-O stretching vibrations from  $\text{MnO}_2$ . (C) SEM images of the  $\text{Ni(OH)}_2/\text{C}$  composite. (D) XRD pattern of the  $\text{Ni(OH)}_2/\text{C}$  composite (the (002) peak is from graphitic carbon). (E) CV curves of the  $\text{Ni(OH)}_2\text{-MnO}_2/\text{C}$ ,  $\text{Ni(OH)}_2/\text{C}$ ,  $\text{MnO}_2/\text{C}$  and NPC at a scan rate of 100 mV/s. (F) Rate performance of the  $\text{Ni(OH)}_2/\text{C}$  composite at different current densities.

**Table S1.** The electrochemical performance contribution of each component to the total performance of Ni(OH)<sub>2</sub>-MnO<sub>2</sub>/C composite.

| Component           | Weight percentage (%) | Performance contribution (%) |
|---------------------|-----------------------|------------------------------|
| NPC                 | 16                    | 1.7                          |
| MnO <sub>2</sub>    | 18                    | 7.2                          |
| Ni(OH) <sub>2</sub> | 66                    | 91.1                         |

Based on the weight percentage of each component of Ni(OH)<sub>2</sub>-MnO<sub>2</sub>/C composite obtained from inductively coupled plasma-mass spectrometry (ICP-MS) measurements and corresponding result of electrochemical characterization, the performance contribution of each component can be roughly obtained, which indicates Ni(OH)<sub>2</sub> plays an essential role.

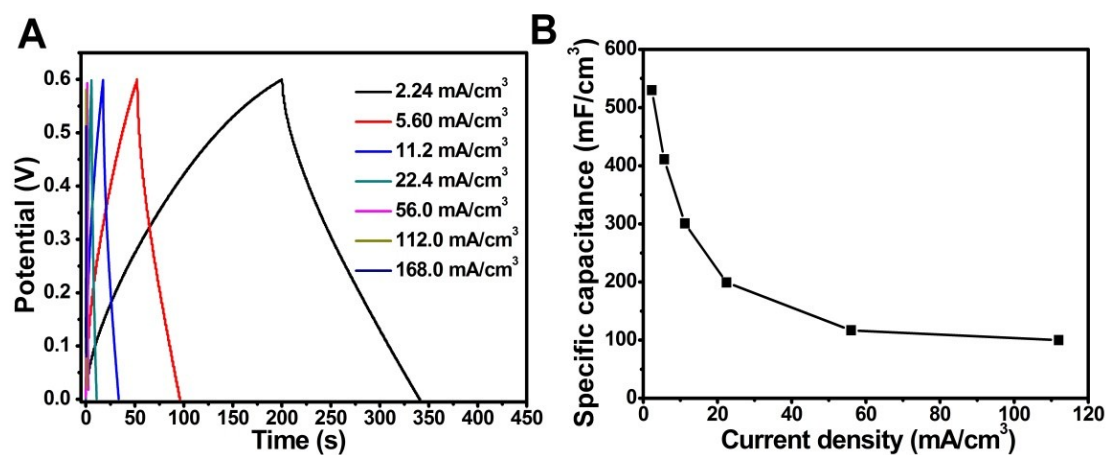

**Fig. S9.** Electrochemical measurements of the fabricated all-solid-state supercapacitors device based on obtained Ni(OH)<sub>2</sub>-MnO<sub>2</sub>/C composite. (A) Charge/discharge curves at different current densities. (B) Specific capacitances at different current densities.

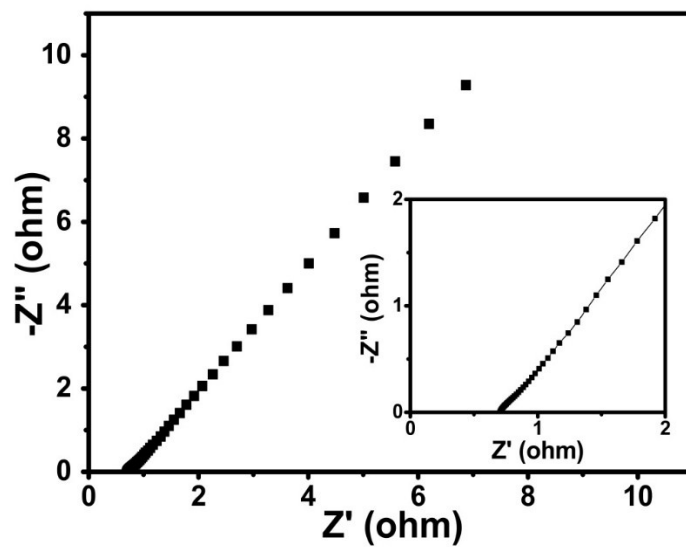

**Fig. S10.** Nyquist plot of the fabricated all-solid-state supercapacitors device based on obtained  $\text{Ni(OH)}_2\text{-MnO}_2/\text{C}$  composite, which shows an equivalent series resistance of  $0.71 \Omega$ .
